# Supplementary material for: Long-read sequencing and de novo genome assemblies reveal complex chromosome end structures caused by telomere dysfunction at the single nucleotide level
Source: PubMed Central journal article supplement — Nucleic Acids Res. 2021 Mar 8;49(6):3338–53. doi: 10.1093/nar/gkab141 (PMC8034613; doi:10.1093/nar/gkab141), 2021-03-08
Supplement: gkab141_supplemental_file.pdf [file gkab141_supplemental_file.pdf]

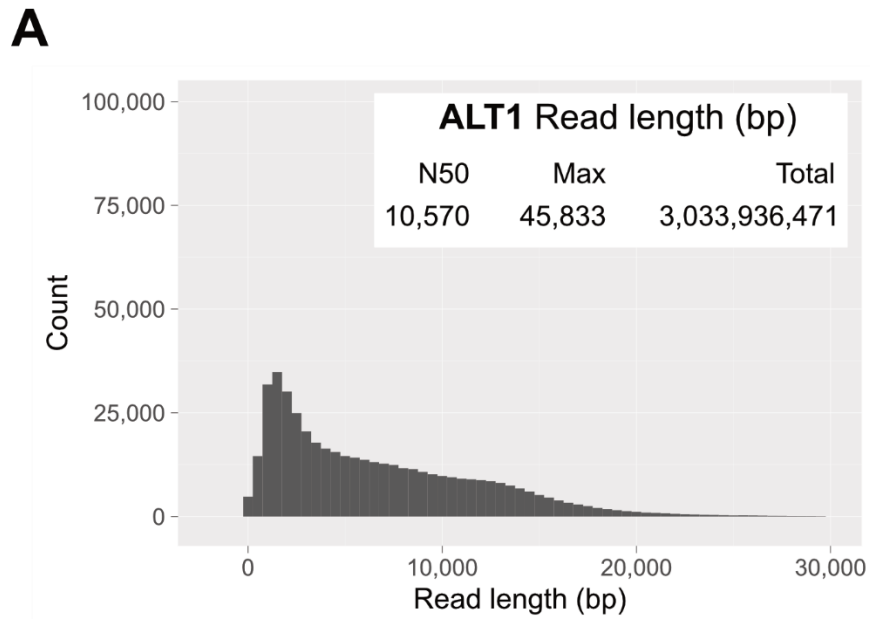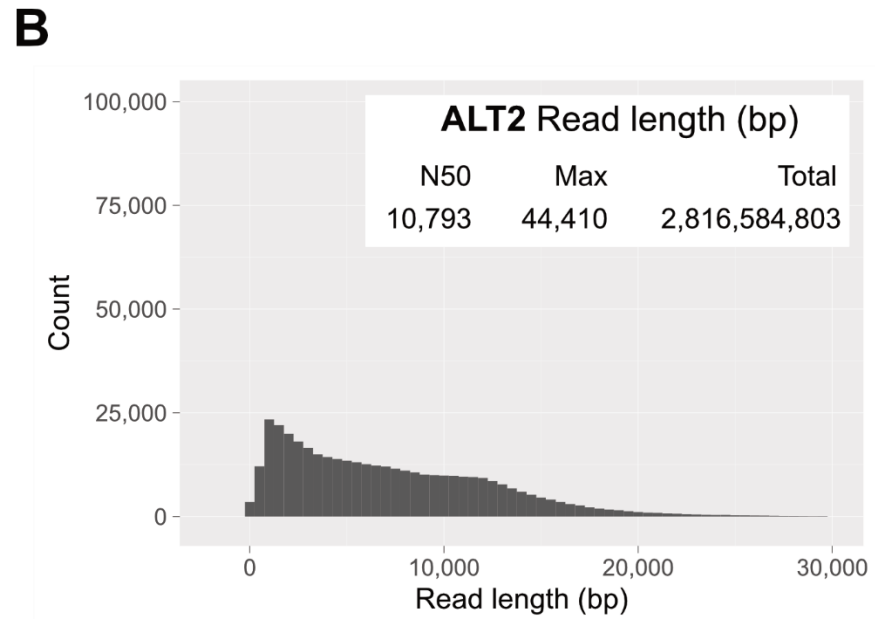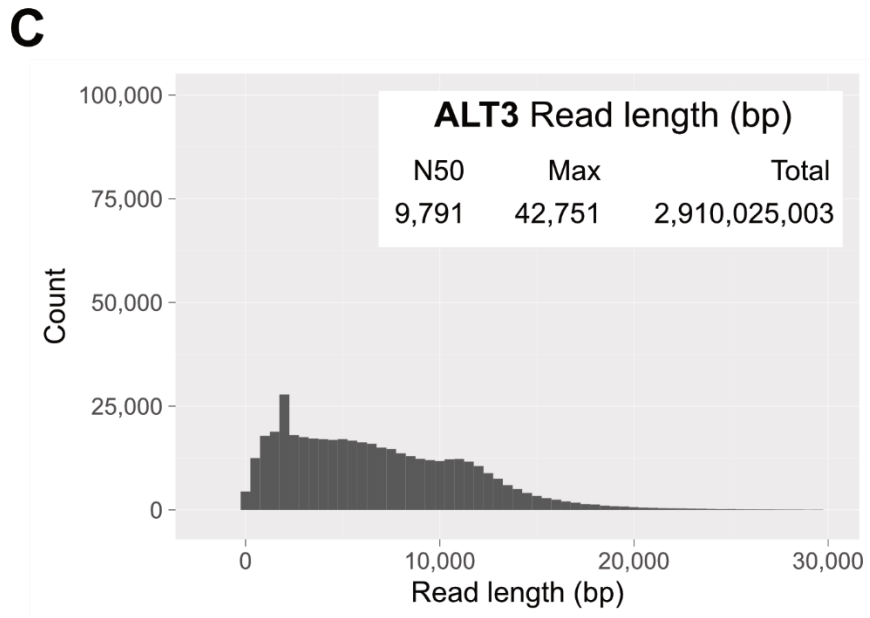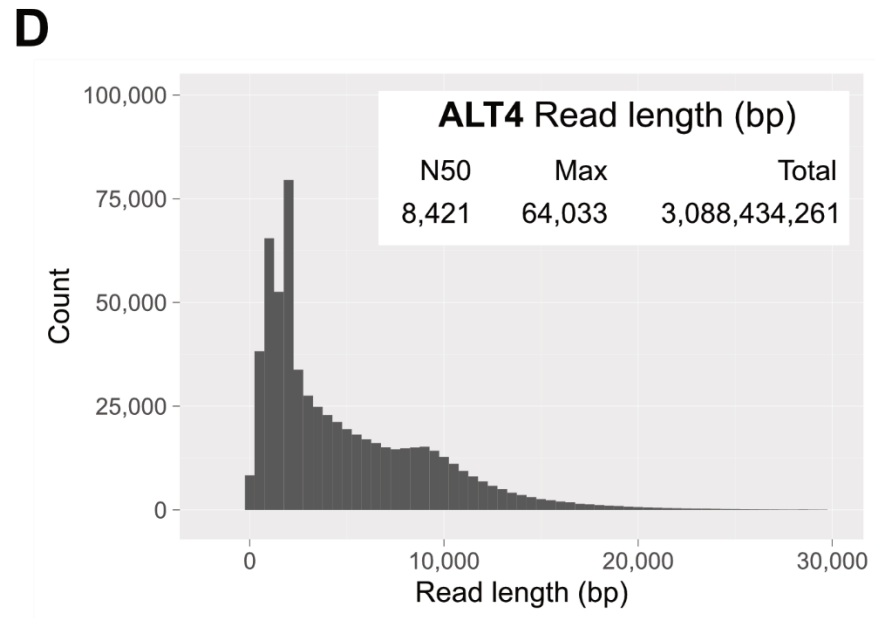

**Supplementary Figure S1.** PacBio read-length distributions of ALT1 (A), ALT2 (B), ALT3 (C) and ALT4 (D) survivor lines.

**A**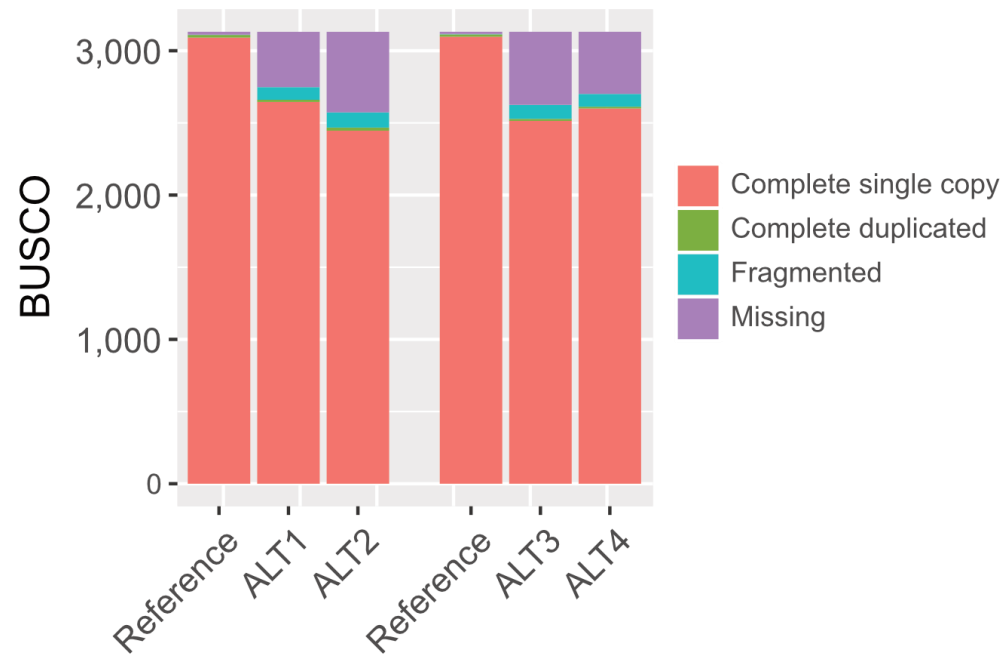**B**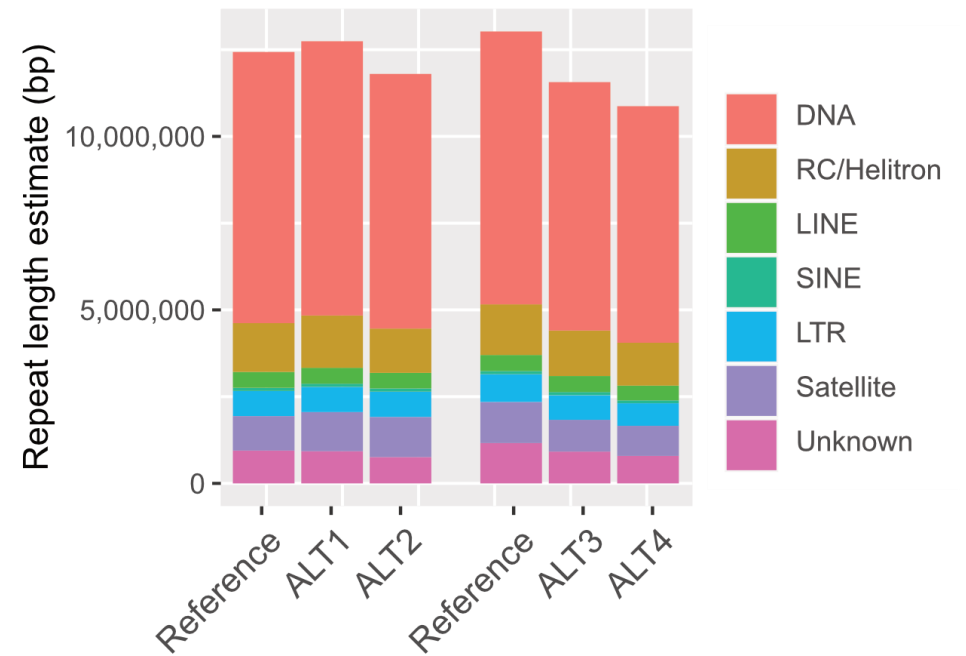

**Supplementary Figure S2.** Quality assessment for de novo genome assemblies of the four *Caenorhabditis elegans* ALT survivor lines. **(A)** The result of Benchmarking Universal Single-Copy Orthologs (BUSCO) analysis for the four genome assemblies. The first Reference corresponds to the scores of the CB4856 genome and the second Reference corresponds to those of the PD1074 genome, a long-read-based N2 genome assembly. **(B)** Estimated repetitive sequence lengths for each assembly based on the total read depths in annotated repeats. The first reference represents the CB4856 genome and the second represents the PD1074 genome.

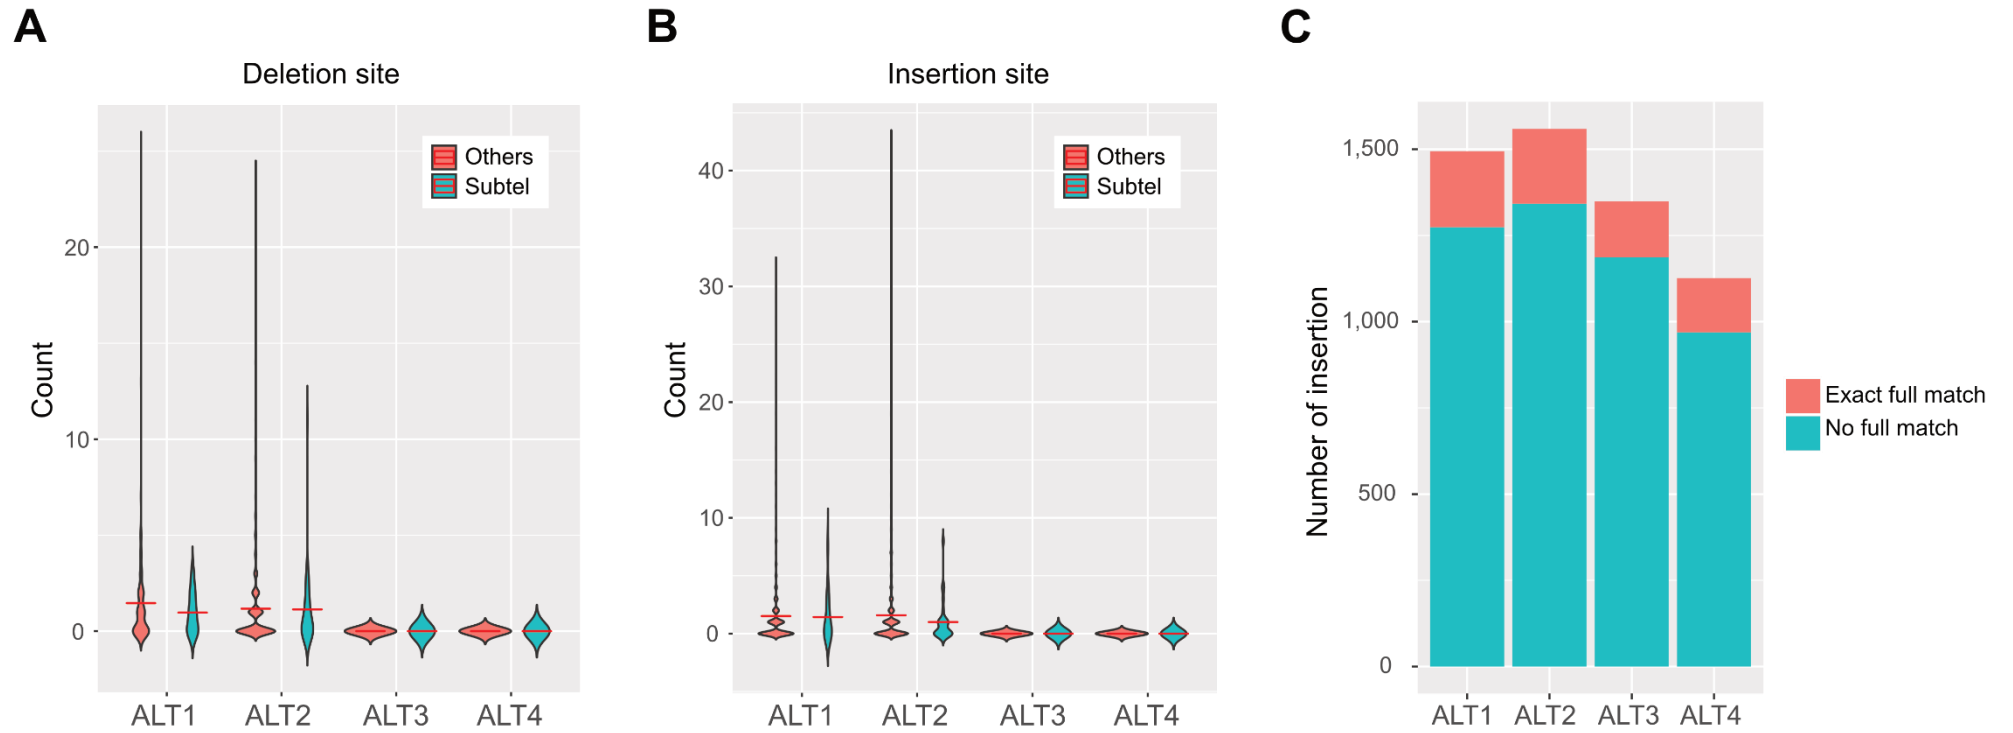

**Supplementary Figure S3.** Insertions and deletions of the 4 ALT survivor lines **(A)** Deletion distributions in subtelomeric regions and other genomic regions. **(B)** Insertion distributions in subtelomeric regions and other genomic regions. Subtelomeric regions were defined as 200-kb regions from each chromosomal end. **(C)** Ratios of templated insertions to the insertions <50 bp are shown.



**A** Schematic representation of template switching between units **a** and **b**

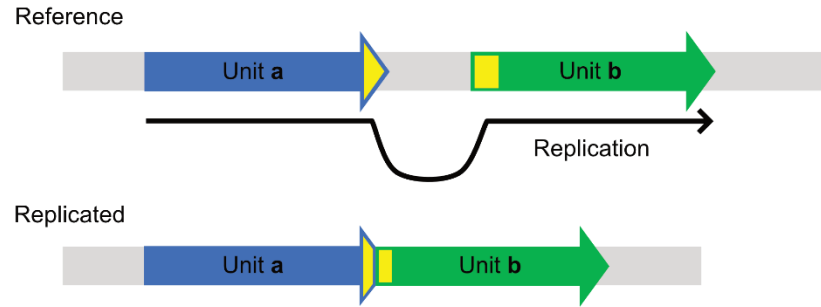

**B** Reference sequences of units **a** and **b**

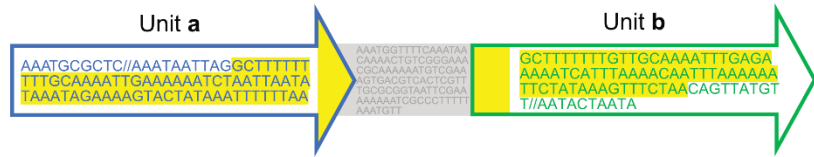

Sequences :

```

AAATGCGCTC//AAATAATTAGGCTTTTTTGTGCAAAATTGAAAAAATCTAAT
TAATATAAATAGAAAAGTACTATAAATTTTAAAAATGGTTTTCAAATAACAA
AACTGTCGGGAAACGCAAAAAATGCGAAAAGTGACGTCACCTGTTGCGC
GGTAATTCGAAAAAAATCTGCCCTTTTAAATGTGCTTTTTTGTGCAAA
ATTGAGAAAAATCATTTAAAACAATTTAAAAAATCTATAAAGTTCTAACAG
TTATGTT//AATACTAATA
    
```

**C** Replicated sequences of units **a** and **b** in the ALT1 chromosome XL

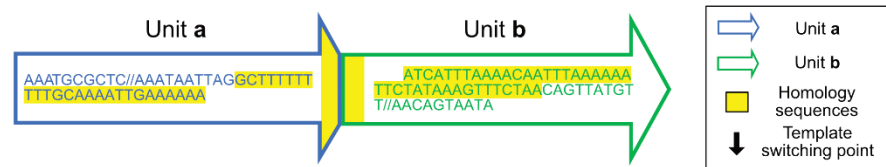

Sequences :

```

AAATGCGCTC//AAATAATTAGGCTTTTTTGTGCAAAATTGAAAAAATCATTAAA
ACAAATTTAAAAAATCTATAAAGTTTCTAACAGTTATGTT//AACAGTAATA
    
```

Homology sequences

```

a GCTTTTTT - TTGCAAAATT - GAAAAA TCTAATTAATAT AAATGAAAAAGTACTATAAATTTTTTAA
b GCTTTTTTGTGCAAAATTGAGAAAAATCATT TAAAACAATTTAAAAA TTCTATAAAGTTTCTAA
    
```

Replicated GCTTTTTT TTGCAAAATT GAAAAA ATCATT TAAAACAATTTAAAAA TTCTATAAAGTTTCTAA

**D** Schematic representation of template switching between units **f** and **f'**

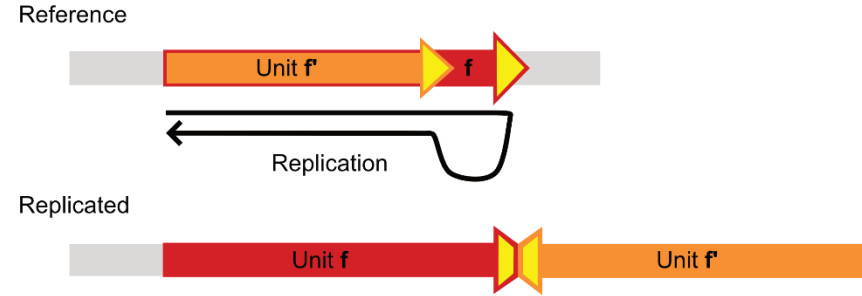

**E** Reference sequences of units **f** and **f'**

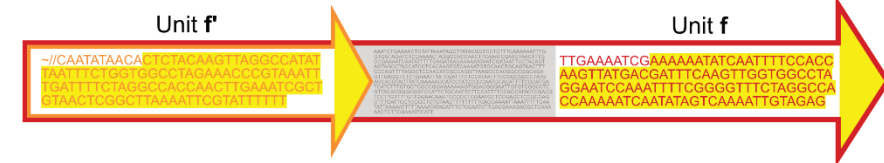

Reverse complementary sequences of **f'** :

```

AAAAAATACGAATTTAAGCCGAGT
TACAGCGATTTCAAGTTGGTGGCC
TAGAAAATCAAATTTACGGGTTTCT
AGGCCACCAGAAATTAATATGGCT
AACTTGTAGAGTGTATATTG//~
    
```

Sequences of **f** :

```

~//TTGAAAAATCGAAAAAATATCAATT
TTCCACCAAGTTATGACGATTTCAA
GTTGGTGGCCTAGGAATCCAAATTT
TCGGGGTTTCTAGGCCACCAAAAA
TCAATATAGTCAAATTTGTAGAG
    
```

**F** Replicated sequences of units **f** and **f'** in the ALT1 chromosome XL

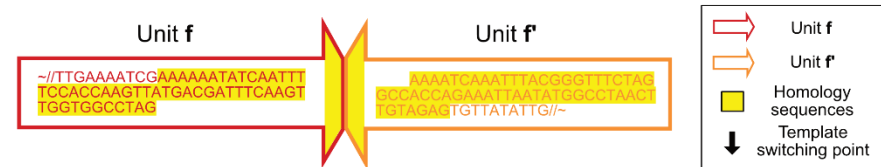

Sequences :

```

~//TTGAAAAATCGAAAAAATATCAATTTCCACCAAGTTATGACGATTTCAAGTTG
GTGGCCTAGAAAATCAAATTTACGGGTTTCTAGGCCACCAGAAATTAATATGGC
CTAACTTGTAGAGTGTATATTG//~
    
```

Homology sequences

```

f AAAAAATA TCAATTTCCACCAAGTTATGACGATTTCAAGTTGGTGGCCTAGGAATCCAAATTTTCGGGGTTTCTAGGCCACCAAAAAATCAATATAGTCAAATTTGTAGAG
f' AAAAAATACGAATTTAAGCCGAGTTACAGCGATTTCAAGTTGGTGGCCTAGAAAATCAAATTTA CGGG- TTCTAGGCCACCAGAAATTAATATGGCCTAACTTGTAGAG
    
```

Replicated AAAAAATA TCAATTTCCACCAAGTTATGACGATTTCAAGTTGGTGGCCTAG AAAATCAAATTTA CGGG- TTCTAGGCCACCAGAAATTAATATGGCCTAACTTGTAGAG

**Supplementary Figure S5.** Sequence and homology information of units **a** and **b**, and **f** and **f'** in the reference CB4856 and ALT1 chromosome XL. **(A)** Schematic representation of template switching between units **a** (blue arrow) and **b** (green arrow). **(B)** Reference sequences of units **a** (blue arrow and sequences) and **b** (green arrow and sequences). Homologous regions between the two units are coloured in yellow background, and non-replicated sequences in the ALT1 survivor line are coloured in grey. **(C)** Replicated sequences of units **a** (blue arrow and sequences) and **b** (green arrow and sequences) in the ALT1 chromosome XL. Homology sequences are coloured in yellow background, and a possible template switching point is marked with black arrows. **(D)** Schematic representation of template switching between units **f** (red arrow) and **f'** (orange arrow). Unit **f'** is a part of unit **f** and 671-bp shorter than unit **f**. **(E)** Reference sequences of units **f** (red arrow and sequences) and **f'** (orange arrow and sequences). Homologous regions between the two units are coloured in yellow background, and non-replicated sequences in the ALT1 survivor line are coloured in grey. Unlike units **a** and **b**, units **f** and **f'** were connected in the opposite direction. Therefore, homologous sequences of unit **f'** are indicated as reverse complementary sequences for easy comparison with that of unit **f**. **(F)** Replicated sequences of units **f** (red arrow and sequences) and **f'** (orange arrow and sequences) in the ALT1 chromosome XL. Homology sequences are coloured in yellow background, and a possible template switching point is marked with black arrows. '/' indicates that some sequences are omitted.

### ALT1

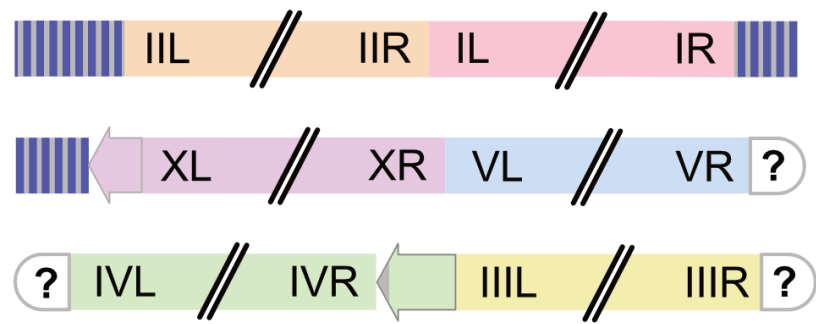

### ALT2

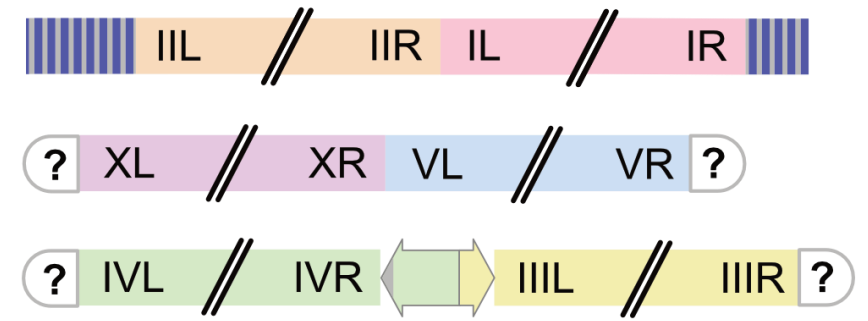

### ALT3

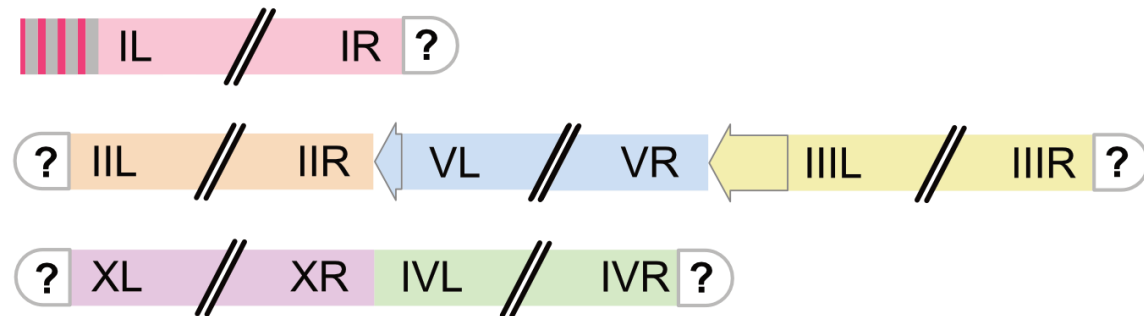

### ALT4

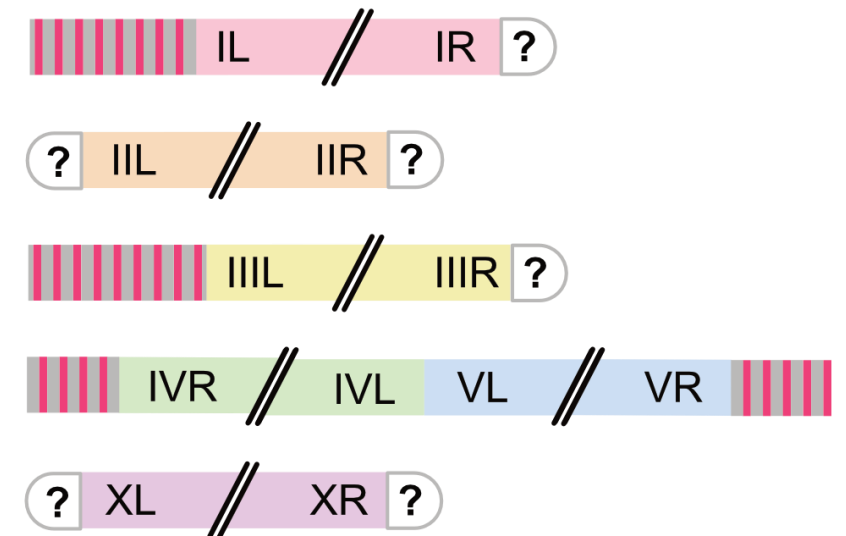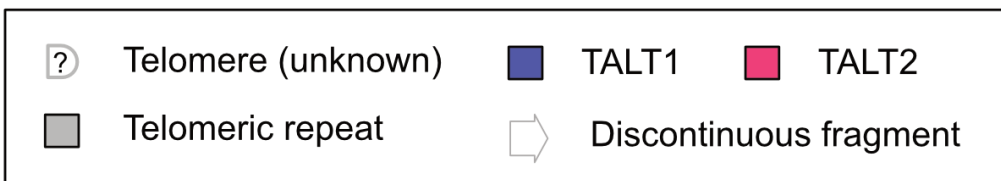

**Supplementary Figure S6.** Karyotypes of the four *Caenorhabditis elegans* ALT survivor lines. The fused chromosome ends identified are represented by their corresponding repair or reconstruction mechanisms. The other unknown chromosome ends are marked with question marks.

**Supplementary Table S1.** Genome assembly statistics of four ALT survivors.

|                             | <b>ALT1</b> | <b>ALT2</b> | <b>ALT3</b> | <b>ALT4</b> |
|-----------------------------|-------------|-------------|-------------|-------------|
| Sum (bp)                    | 104,562,308 | 101,858,375 | 95,198,557  | 95,972,472  |
| Contig number               | 763         | 754         | 891         | 764         |
| Average length (bp)         | 137,041     | 135,090     | 106,844     | 125,618     |
| Longest contig length (bp)  | 1,474,610   | 2,078,747   | 1,252,834   | 3,090,732   |
| N50 length (bp)             | 388,786     | 389,851     | 241,979     | 386,771     |
| Shortest contig length (bp) | 1,092       | 1,706       | 1,497       | 1,081       |



**Supplementary Table S2.** Total lengths (bp) of assembled repetitive elements in the reference genomes and the four *Caenorhabditis elegans* ALT survivor lines.

|             | <b>CB4856</b> | <b>ALT1</b> | <b>ALT2</b> | <b>PD1074</b> | <b>ALT3</b> | <b>ALT4</b> |
|-------------|---------------|-------------|-------------|---------------|-------------|-------------|
| DNA         | 7,951,825     | 7,534,902   | 7,024,773   | 7,879,736     | 6,951,281   | 7,011,242   |
| RC/Helitron | 1,601,973     | 1,398,099   | 1,215,605   | 1,563,395     | 1,236,168   | 1,291,131   |
| LINE        | 467,539       | 481,495     | 455,487     | 472,739       | 461,295     | 460,340     |
| LTR         | 726,808       | 684,700     | 618,444     | 700,145       | 648,918     | 643,046     |
| rRNA        | 34,349        | 37,259      | 45,133      | 13,916        | 33,828      | 35,741      |
| Satellite   | 1,223,473     | 957,971     | 991,259     | 1,222,435     | 758,057     | 834,028     |
| SINE        | 94,713        | 98,609      | 94,079      | 91,711        | 91,637      | 89,168      |
| snRNA       | 8,426         | 8,187       | 7,843       | 8,754         | 8,600       | 8,151       |
| tRNA        | 45,409        | 46,492      | 46,095      | 44,829        | 43,399      | 43,910      |
| Unknown     | 1,038,780     | 834,964     | 721,372     | 1,009,842     | 770,126     | 774,647     |

**Supplementary Table S3.** Total estimated true lengths (bp) of repetitive elements in the reference genomes and the four *Caenorhabditis elegans* ALT survivor lines. The estimated true lengths were measured by raw read depth of repeat sequences normalised with average whole genome sequence depth.

|             | <b>CB4856</b> | <b>ALT1</b> | <b>ALT2</b> | <b>PD1074</b> | <b>ALT3</b> | <b>ALT4</b> |
|-------------|---------------|-------------|-------------|---------------|-------------|-------------|
| DNA         | 7,814,577     | 7,902,698   | 7,338,214   | 7,864,193     | 7,158,712   | 6,817,539   |
| RC/Helitron | 1,405,649     | 1,507,025   | 1,275,676   | 1,458,149     | 1,309,549   | 1,235,190   |
| LINE        | 457,885       | 456,409     | 448,005     | 461,089       | 459,560     | 423,323     |
| LTR         | 723,054       | 727,223     | 728,551     | 800,244       | 709,012     | 651,126     |
| rRNA        | 342,214       | 193,129     | 398,146     | 250,824       | 303,545     | 1,147,672   |
| Satellite   | 992,769       | 1,126,174   | 1,155,338   | 1,182,507     | 915,747     | 866,536     |
| SINE        | 92,752        | 93,888      | 95,426      | 94,304        | 93,844      | 83,971      |
| snRNA       | 8,353         | 8,074       | 8,263       | 8,115         | 8,222       | 8,258       |
| tRNA        | 45,909        | 46,987      | 47,468      | 43,634        | 43,452      | 42,429      |
| Unknown     | 946,520       | 927,411     | 758,480     | 1,163,335     | 916,396     | 79,2686     |

**Supplementary Table S4.** N2-type variants of ALT1 and ALT2 lines

|      | Deletion |          |          | Insertion |          |          |
|------|----------|----------|----------|-----------|----------|----------|
|      | Shared   | Specific | Ratio    | Shared    | Specific | Ratio    |
| ALT1 | 420      | 202      | 0.675241 | 303       | 203      | 0.598814 |
| ALT2 | 420      | 80       | 0.84     | 303       | 88       | 0.774936 |

**Supplementary Table S5.** Indels that ALT1 and ALT2 may or may not share

|                | Deletion           |         |       | Insertion          |         |       |
|----------------|--------------------|---------|-------|--------------------|---------|-------|
|                | ≥ 5 bp and < 50 bp | ≥ 50 bp | Total | ≥ 5 bp and < 50 bp | ≥ 50 bp | Total |
| Common in ALT1 | 66                 | 24      | 90    | 74                 | 17      | 91    |
| Common in ALT2 | 76                 | 23      | 99    | 74                 | 18      | 92    |
| ALT1-specific  | 769                | 633     | 1,402 | 1,420              | 54      | 1,474 |
| ALT2-specific  | 751                | 357     | 1,108 | 1,486              | 46      | 1,532 |

\* N2-type variants were not counted in this table.

**Supplementary Table S6.** Number of indels by size in 4 ALT survivors

|      | Deletion          |         |       | Insertion         |         |       |
|------|-------------------|---------|-------|-------------------|---------|-------|
|      | >1 bp and ≤200 bp | >200 bp | Total | >1 bp and ≤200 bp | >200 bp | Total |
| ALT1 | 1,136             | 356     | 1,492 | 1,527             | 38      | 1,565 |
| ALT2 | 1,015             | 192     | 1,207 | 1,591             | 32      | 1,623 |
| ALT3 | 797               | 149     | 946   | 1,366             | 9       | 1,375 |
| ALT4 | 1,621             | 907     | 2,528 | 1,137             | 5       | 1,142 |

**Supplementary Table S7.** List of translocations in 4 ALT survivors

| ALT1       |           | ALT2       |           | ALT3       |           | ALT4       |           |
|------------|-----------|------------|-----------|------------|-----------|------------|-----------|
| Chromosome | Size (bp) |
| III>IV     | 165,474   | III>V      | 89,411    | X>II       | 75,297    | II>X       | 279,051   |
| V>X        | 272,526   | II>IV      | 467,213   | X>IV       | 50,535    | V>V        | 553,768   |
| V>V        | 450,827   | V>V        | 100,921   | I>II       | 96,581    | V>I        | 132,078   |
| II>IV      | 168,931   | X>III      | 105,744   | I>V        | 127,558   | X>IV       | 1,300,899 |
| III>I      | 62,784    | X>III      | 337,839   | II>X       | 54,667    | I>II       | 73,517    |
| V>V        | 61,415    |            |           | V>I        | 59,162    | I>II       | 900,645   |
|            |           |            |           | V>V        | 249,995   | I>I        | 397,594   |
|            |           |            |           | X>III      | 65,940    | III>IV     | 159,619   |
|            |           |            |           |            |           | IV>V       | 94,146    |

**Supplementary Table S8.** Summary of categorising repair or reconstruction mechanisms at each chromosome end.

|      | <b>ALT1</b>          | <b>ALT2</b>   | <b>ALT3</b>   | <b>ALT4</b>   |
|------|----------------------|---------------|---------------|---------------|
| IL   | Simple fusion        | Simple fusion | TALT end      | TALT end      |
| IR   | TALT end             | TALT end      | .             | .             |
| IIL  | TALT end             | TALT end      | .             | .             |
| IIR  | Simple fusion        | Simple fusion | BFB fusion    | .             |
| IIIL | BFB fusion           | BFB fusion    | BFB fusion    | TALT end      |
| IIIR | .                    | .             | .             | .             |
| IVL  | .                    | .             | Simple fusion | Simple fusion |
| IVR  | BFB fusion           | BFB fusion    | .             | TALT end      |
| VL   | Simple fusion        | Simple fusion | BFB fusion    | Simple fusion |
| VR   | .                    | .             | BFB fusion    | TALT end      |
| XL   | TALT end with FoSTeS | .             | .             | .             |
| XR   | Simple fusion        | Simple fusion | Simple fusion | .             |

**Supplementary Table S9.** Sequence information of simple fusion breakpoints.

| Line | Contig name | Fusion chromosome | Fusion sequence                                                                                                                                                                                                                           |
|------|-------------|-------------------|-------------------------------------------------------------------------------------------------------------------------------------------------------------------------------------------------------------------------------------------|
| ALT1 | tig00000324 | IIR-IL            | GACTTGCTACAGTACTTTAGCTACAGTACCCCAGCTTGACTTGCTACAGTACTTTAGCTACAGTACCCCATCTTGA<br>CATGCTACAGTACACTATCTTGAC <b>CACGCCTGCTCGAATTT</b> CGCAAAAACGTGTCGTGTCGAGACCCCAATTAC<br>AGTATTTTTGACCCGAATATCGCGAAAATTCGAGTCTGGGTGAAAACAT                  |
| ALT1 | tig00002922 | XR-VL             | ACGTCTTCTACACTTCTGGCTTCTGGGCGTACCCGATTCTCGGAGAACTTGCCGCACCATTCCGCCTTGTGTTCA<br>TTGCTGCCTGCATGTTTATTGTC <b>ATACCACTATCATTAAAA</b> CATTTGGAAATTATTTTTGATTGTTTATATTCAAGT<br>AGCAAGAAAGTCTCCTAGCCTTAAAAATAGGAAATTTTTGCTCTTT                   |
| ALT2 | tig00000558 | IIR-IL            | GACTTGCTACAGTACTTTAGCTACAGTACCCCAGCTTGACTTGCTACAGTACTTTAGCTACAGTACCCCATCTTGA<br>CATGCTACAGTACACTATCTTGAC <b>CACGCCTGCTCGAATTT</b> CGCAAAAACGTGTCGTGTCGAGACCCCAATTACA<br>GTATTTTTGACCCGAATATCGCGAAAATTCGAGTCTGGGTGAAAACATT                 |
| ALT2 | tig00000501 | XR-VL             | ACGTCTTCTACACTTCTGGCTTCTGGGCGTACCCGATTCTCGGAGAACTTGCCGCACCATTCCGCCTTGTGTTCA<br>TTGCTGCCTGCATGTTTATTGTC <b>ATACCACTATCATTAAAA</b> CATTTGGAAATTATTTTTGATTGTTTATATTCAAGTA<br>GCAAGAAAGTCTCCTAGCCTTAAAAATAGGAAATTTTTGCTCTTTC                  |
| ALT3 | tig00000627 | XR-IVL            | GACTTTATTAATGCAAAATAAACTCTAAAAACCGTCAGTTTTCCAGCCTCCATTACGTCTTCTACACTTCTGGCTTCT<br>GGGCGTACCCGATTCTCGG <b>AGA</b> ACTTG <b>AAAAGGAATCCGAAAACAGTAGTTATTACAATGGTTACTTGAAATATG</b><br><b>GACAGCTGATGAAGTGAGACATTTAAAAATTATTTTTGTATCACTCCC</b> |
| ALT4 | tig00001818 | VL-IVL            | AACGGCTCGAAAAGTTTGCACCGTCCGGATGGAAAAGTGTGGCACGCGTGGGCGTTAAGGTGCCATACGTGTT<br>GCACTTACGATTCAAATTTTTATCCGC <b>GTTAAGGCTCATGATGTTCTTGGAGAGCATCAGTGTTGTGCTCAGAAAA</b><br><b>ATGTTCTAGTTTTGGAAGAATTACAAAAGTTTACAAAACAAAATGATTA</b>             |

\* The colour of each sequence matches the colour of the fusion chromosome name. **Bold**: homologous sequences between two chromosomes





|      |             |                         |                                                                                                                                                                                                                           |
|------|-------------|-------------------------|---------------------------------------------------------------------------------------------------------------------------------------------------------------------------------------------------------------------------|
| ALT3 | tig00043120 | IIR-VL fragment 5'      | AATGGCCTATCCTTGTACCACGTGCAGGCCGAGAAAAGGAGGGGCGGGAAGACGCAGAACCTCTCGCTGTCT<br>GCGTCTAACCCTTCTTGAGTC <b>TAACCCTTCCGTATAAATTTTT</b> CAGATTATCAGTGTTGATAACATTTTCAAGAA<br>AAACATAAATAAACAAGAACAACGCATTTTGTATCAGGGAAAACAGCGAAAAA |
| ALT3 | tig00043120 | VL fragment 3'-VL       | GAGCAAAAAATTTCTATTTTTAGGCTAGGACACTTTCTTGCTACTTAAATATAACAATCAAAAAATAATTTCCA<br>AATGTTTTAATGGTAGTGGTATT <b>AATACCTAATAGGTATCCCCATTAATTTTTTTTT</b> CAAGAAGAATGGCAACACA<br>AACACCCCTCTCTGATGACTCGTGTGTCAAAAACGAGCTCACGGAAC    |
| ALT3 | tig00000971 | VR-IIIIL fragment 5'    | ACCTTTTCCTTACTATTTGGTTGTCAAATTACATTTATTTGGAAATTTTGTGAGTTTTAACTTGTATATAAACTTG<br>TTTTTCCATAGTTGTTTGAT <b>CTTCAATTCATTACATCTACTTTTT</b> GCTATCGGACATATTTTATTTAACTTCTGTG<br>TTAAAGAAATTATATCTTTTGAAAATGGTAACAATCAGCCGAGAAG   |
| ALT3 | tig00000971 | IIIIL fragment 3'-IIIIL | GTAAGTTATTCCCTATGCATCATCAGTCGCACCGCTCGTACTAGCTCCGTATCCTCCGCGCGTCATTAAGTAA<br>GCCGCACGTTTGTACCTATCGGGTCT <b>TCGAAATAGGGCAGCGTAGATATAATATCATTGGGTGACACAAAAATA</b><br>ATCGATAATTCCTTCACATGAATGCATTGCTTAGATCTGAGGATGTTTCAGAA  |

\* The colour of each sequence matches the colour of the chromosome or fragment name. \* **Bold**: homologous sequences between two chromosomes; *Red italicised*: randomly inserted sequences; Underlined: telomeric repeat sequences

**Supplementary Table S11.** Sequence identity between each discontinuous fragment and its origin.

|                    | <b>Aligned bases (%)</b> | <b>Average identity (%)</b> | <b># of SNPs</b> | <b># of Indels</b> |
|--------------------|--------------------------|-----------------------------|------------------|--------------------|
| ALT1 IVR fragment  | 99.97                    | 99.49                       | 2                | 30                 |
| ALT2 IIIL fragment | 100                      | 99.51                       | 1                | 16                 |
| ALT2 IVR fragment  | 100                      | 98.52                       | 0                | 40                 |
| ALT3 VL fragment   | 100                      | 98.2                        | 2                | 4                  |
| ALT3 IIIL fragment | 100                      | 99.03                       | 0                | 12                 |

**Supplementary Table S12.** Estimated numbers of the units based on raw read-depth, and the identified numbers in the local re-assembled contigs.

| <b>Units</b> | <b>Estimated number</b> | <b>Identified number</b> |
|--------------|-------------------------|--------------------------|
| a            | 8                       | 3                        |
| b            | 10                      | 4                        |
| c            | 1                       | 1                        |
| d            | 4                       | 1                        |
| e            | 4                       | 2                        |
| f            | 2                       | 2                        |
| g            | 1                       | 1                        |
